# Supplementary material for: The influence of monomer ionization and hydrolysis on the radical polymerization kinetics of 2-(dimethylamino)ethyl methacrylate in aqueous solution
Source: Royal Society of Chemistry journal article supplement (doi:10.1039/d3py00350g), 2023-01-01
Supplement: d3py00350g1.pdf [file d3py00350g1.pdf]

## Supporting Information

# The Influence of Monomer Ionization and Hydrolysis on the Radical Polymerization Kinetics of 2-(Dimethylamino)ethyl Methacrylate in Aqueous Solution

*Opeyemi J. Ajogbeje,<sup>a</sup> Igor Lacík<sup>b,c</sup> and Robin A. Hutchinson<sup>a\*</sup>*

<sup>a</sup> Department of Chemical Engineering, Dupuis Hall, Queen's University, Kingston, Ontario, K7L 3N6, Canada

<sup>b</sup> Department for Biomaterials Research, Polymer Institute of the Slovak Academy of Sciences, Dúbravská cesta 9, 845 41 Bratislava, Slovakia

<sup>c</sup> Centre for Advanced Materials Application, Slovak Academy of Sciences, Dúbravská cesta 9, 845 11, Bratislava, Slovakia

### Topics

|                                                                                         |     |
|-----------------------------------------------------------------------------------------|-----|
| Ionization .....                                                                        | S2  |
| Degree of Ionization of DMAEMA and MAA versus pH .....                                  | S2  |
| Hydrolysis .....                                                                        | S3  |
| <sup>1</sup> H-NMR Spectra and Peak Assignments of MAA and DMAE .....                   | S3  |
| Monitoring of DMAEMA Hydrolysis with <sup>1</sup> H-NMR Stacked Plot .....              | S4  |
| DMAEMA Hydrolysis Rate Coefficients .....                                               | S5  |
| Variation of pH with Ternary DMAEMA-MAA-DMAE Mixtures .....                             | S6  |
| Best Fit Arrhenius Parameters of DMAEMA Hydrolysis .....                                | S7  |
| Free Radical Polymerization .....                                                       | S8  |
| Poly(DMAEMA) <sup>1</sup> H-NMR Spectra in Acidic Water .....                           | S8  |
| Calculations of DMAEMA Hydrolysis and Copolymerization Rates .....                      | S9  |
| Plots of Polymerization Behaviour at Various pH, Temperature and Initiator Levels ..... | S10 |
| 60 °C, 0.4 wt% V-50, pH 8.0 – 10.1 .....                                                | S10 |
| 50 °C, 0.1 wt% V-50, pH 8.0 – 10.1 .....                                                | S11 |
| 50 °C, 0.4 wt% V-50, pH 8.0 – 10.1 .....                                                | S12 |
| Molar Mass Distributions of Poly(DMAEMA-co-MAA) .....                                   | S13 |
| References .....                                                                        | S14 |

### Corresponding author

\*E-mail: robin.hutchinson@queensu.ca

# Ionization

Degree of Ionization of DMAEMA and MAA versus pH

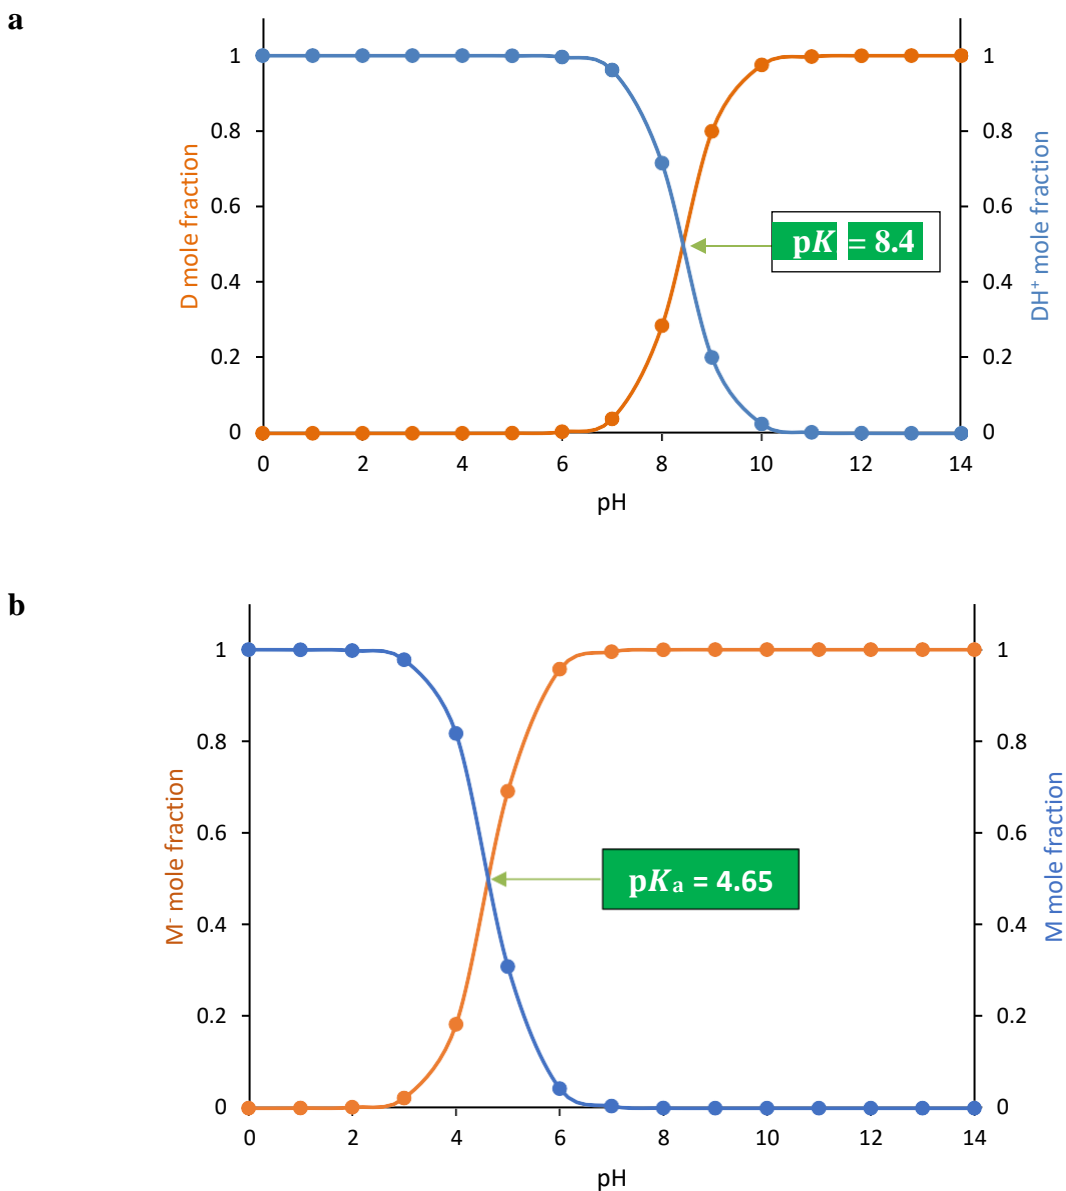

**Figure S1.** (a) D and DH<sup>+</sup> mole fractions as a function of pH, calculated using a DMAEMA  $pK_a$  value of 8.4.<sup>1</sup> (b) Ionized (M<sup>-</sup>) and non-ionized (M) mole fractions for MAA as a function of pH, calculated using a  $pK_a$  of 4.65.<sup>2-4</sup>

# Hydrolysis

## $^1\text{H}$ -NMR Spectra and Peak Assignments of MAA and DMAE

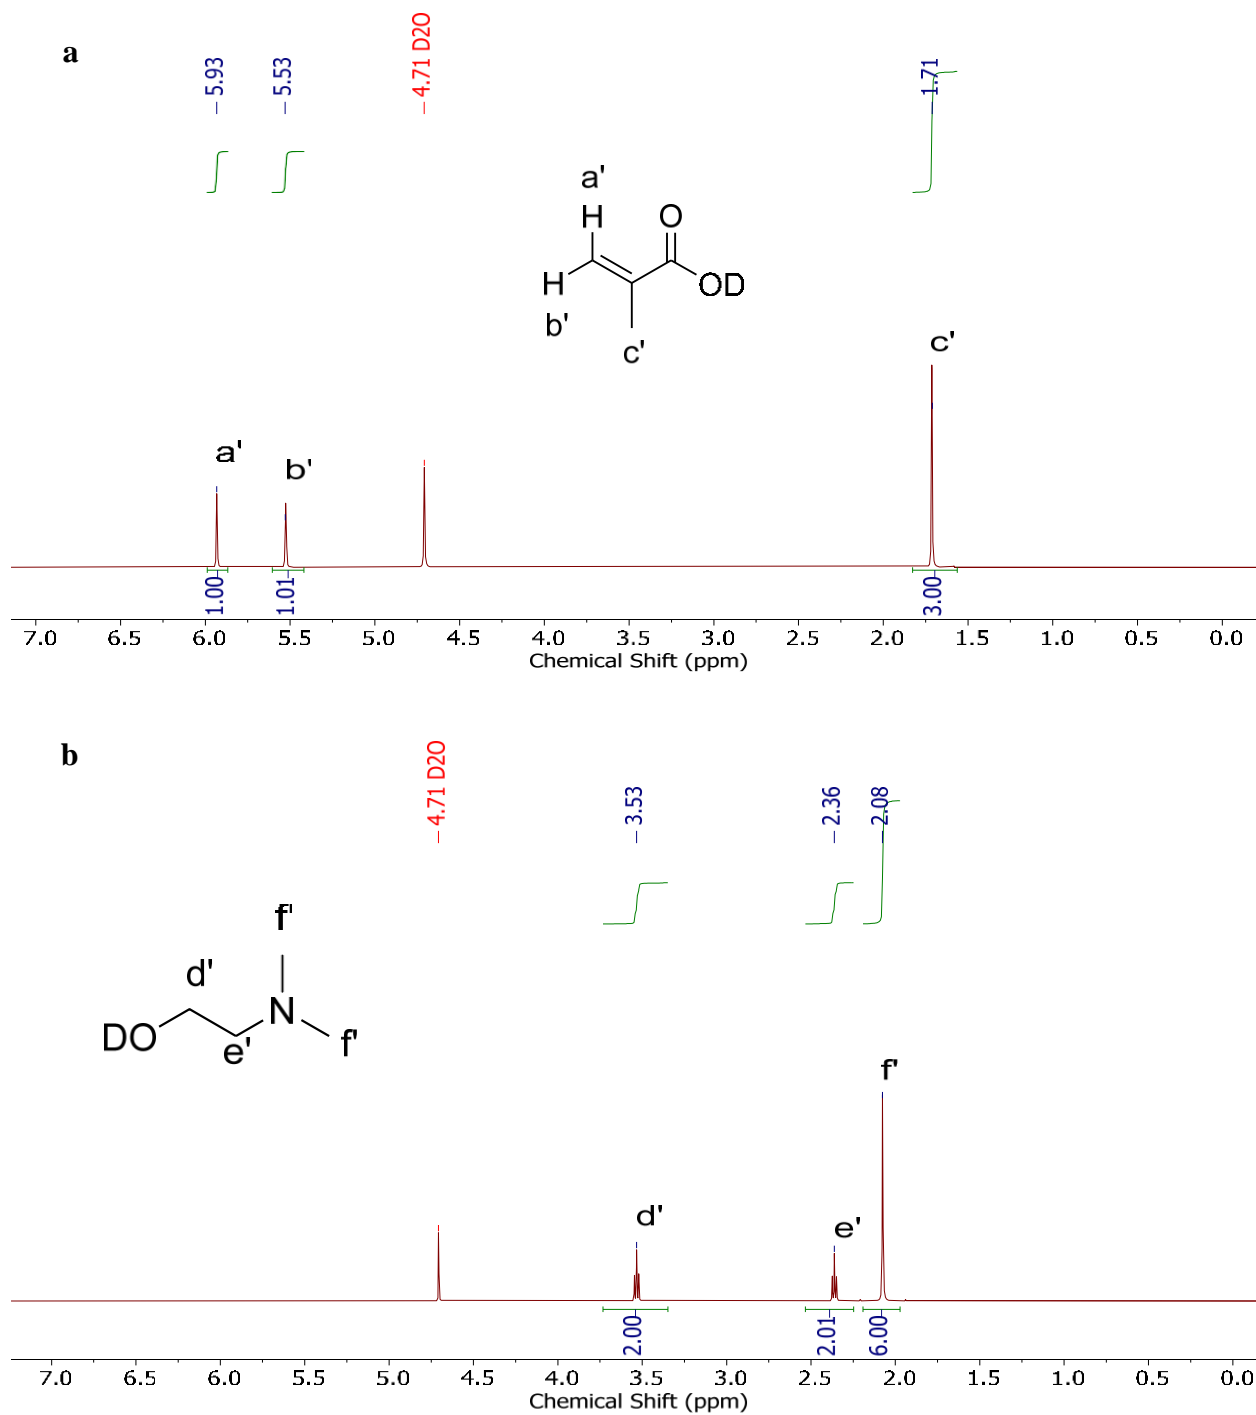

**Figure S2.**  $^1\text{H}$  NMR (500 MHz) spectra of: (a) MAA in  $\text{D}_2\text{O}$ , with MAA signals at 5.71 ppm (s, 1H,  $\text{CH}=\text{C}$  (cis,  $\text{a}'$ )), 5.38 ppm (s, 1H,  $\text{CH}=\text{C}$  (trans,  $\text{b}'$ )) and 1.92 ppm (s, 3H,  $\text{CH}_3$ -C ( $\text{c}'$ )). (b) DMAE in  $\text{D}_2\text{O}$  with DMAE signals at 3.89 ppm (t, 2H,  $\text{CH}_2$ -O ( $\text{d}'$ )), 3.11 ppm (t, 2H,  $\text{CH}_2$ -N ( $\text{e}'$ )) and 2.77 ppm (s, 6H,  $(\text{CH}_3)_2$ -N ( $\text{f}'$ )).<sup>1,5</sup>

Monitoring of DMAEMA Hydrolysis with  $^1\text{H}$ -NMR Stacked Plot

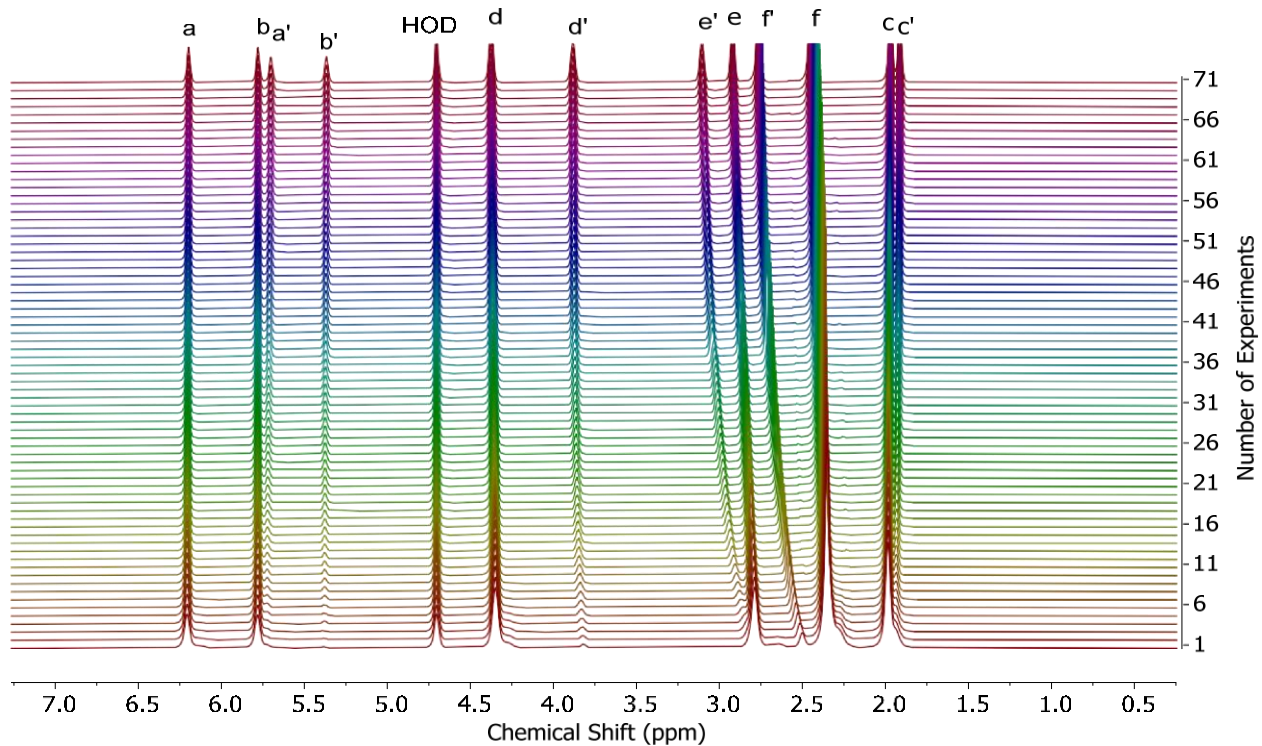

**Figure S3.**  $^1\text{H}$  NMR stacked plot (500 MHz) following DMAEMA hydrolysis in  $\text{D}_2\text{O}$  at 40 °C and pH of 10.1. Spectra were acquired every 80 s (1.33 min).

DMAEMA Hydrolysis Rate Coefficients

**Table S1.** Hydrolysis rate coefficients ( $k_{\text{obs}}$ ) of DMAEMA estimated from various  $^1\text{H}$  NMR peaks a-f (see Figure 1) at pH 10.1.

| Temperature<br>(°C) | Peak | $k_{\text{obs}} \times 10^{-4}$<br>(s <sup>-1</sup> ) |
|---------------------|------|-------------------------------------------------------|
| 40                  | a    | 0.83                                                  |
|                     | b    | -                                                     |
|                     | c    | -                                                     |
|                     | d    | 0.83                                                  |
|                     | e    | -                                                     |
|                     | f    | -                                                     |
| 50                  | a    | 2.2                                                   |
|                     | b    | 2.1                                                   |
|                     | c    | -                                                     |
|                     | d    | 2.1                                                   |
|                     | e    | -                                                     |
|                     | f    | 2.1                                                   |
| 60                  | a    | 4.9                                                   |
|                     | b    | 4.8                                                   |
|                     | c    | 4.8                                                   |
|                     | d    | -                                                     |
|                     | e    | -                                                     |
|                     | f    | -                                                     |
| 70                  | a    | 9.9                                                   |
|                     | b    | 9.7                                                   |
|                     | c    | 9.6                                                   |
|                     | d    | -                                                     |
|                     | e    | -                                                     |
|                     | f    | 10.0                                                  |

### Variation of pH with Ternary DMAEMA-MAA-DMAE Mixtures

To understand the influence of degradation products (MAA and DMAE) on solution pH, equimolar amounts of MAA and DMAE with DMAEMA in H<sub>2</sub>O were prepared and analyzed in the absence of reaction at room temperature. The measurements were conducted using an Orion™ ROSS Ultra™ Refillable pH/ATC Triode™ Combination Electrode, consisting of a glass electrode and reference electrode contained in a single probe and calibrated with buffer solutions of pH 1.68, 4.01, 7.00, 10.01 and 12.46. The electrode was dipped into the solutions and held until a stable pH measurement was achieved, with the probe rinsed with deionized water and soaked in the storage solution when not in use.

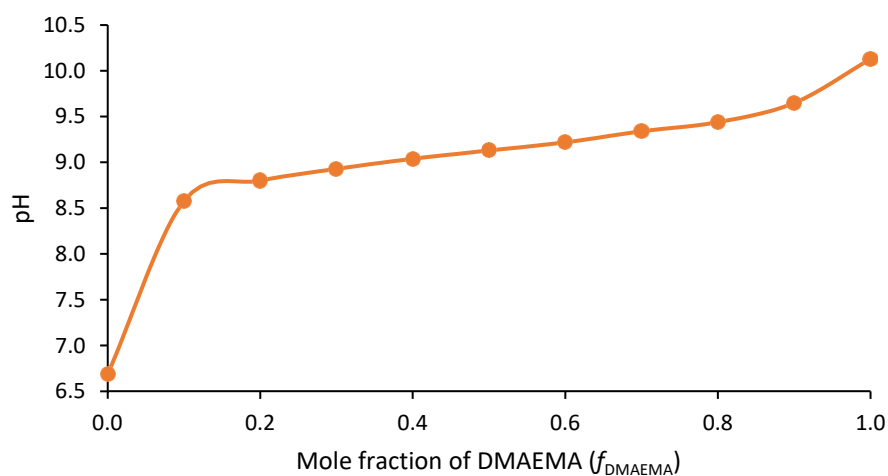

**Figure S4.** The variation of solution pH with composition of ternary DMAEMA-MAA-DMAE mixtures in H<sub>2</sub>O at room temperature, adding MAA and DMAE in equimolar quantities while keeping total content at 10 wt%, where mole fraction of DMAEMA ( $f_{\text{DMAEMA}}$ ) is given by

$$f_{\text{DMAEMA}} = \frac{\text{mol DMAEMA}}{\text{mol DMAEMA} + \text{mol MAA} + \text{mol DMAE}}$$

## Best Fit Arrhenius Parameters of DMAEMA Hydrolysis

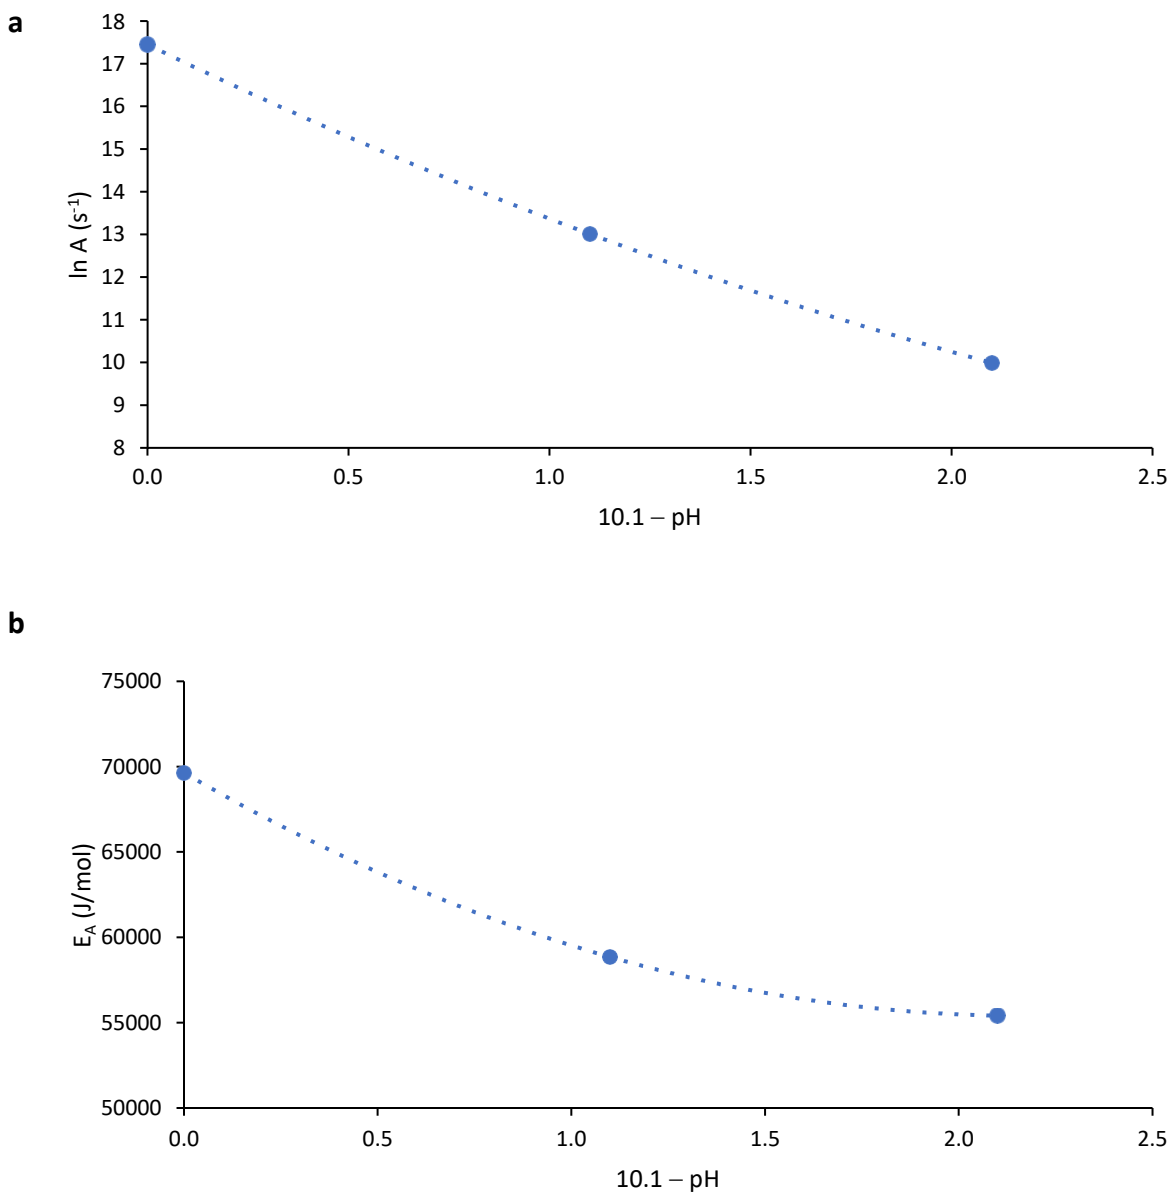

**Figure S5.** Best fit Arrhenius parameters (a)  $\ln A$  and (b)  $E_A$  values (points, see Table 2) determined for DMAEMA hydrolysis, plotted as a function of  $(10.1 - \text{pH})$ . Lines show quadratic fits summarized by Eq. 7-9.

# Free Radical Polymerization

## Poly(DMAEMA) $^1\text{H}$ -NMR Spectra in Acidic Water

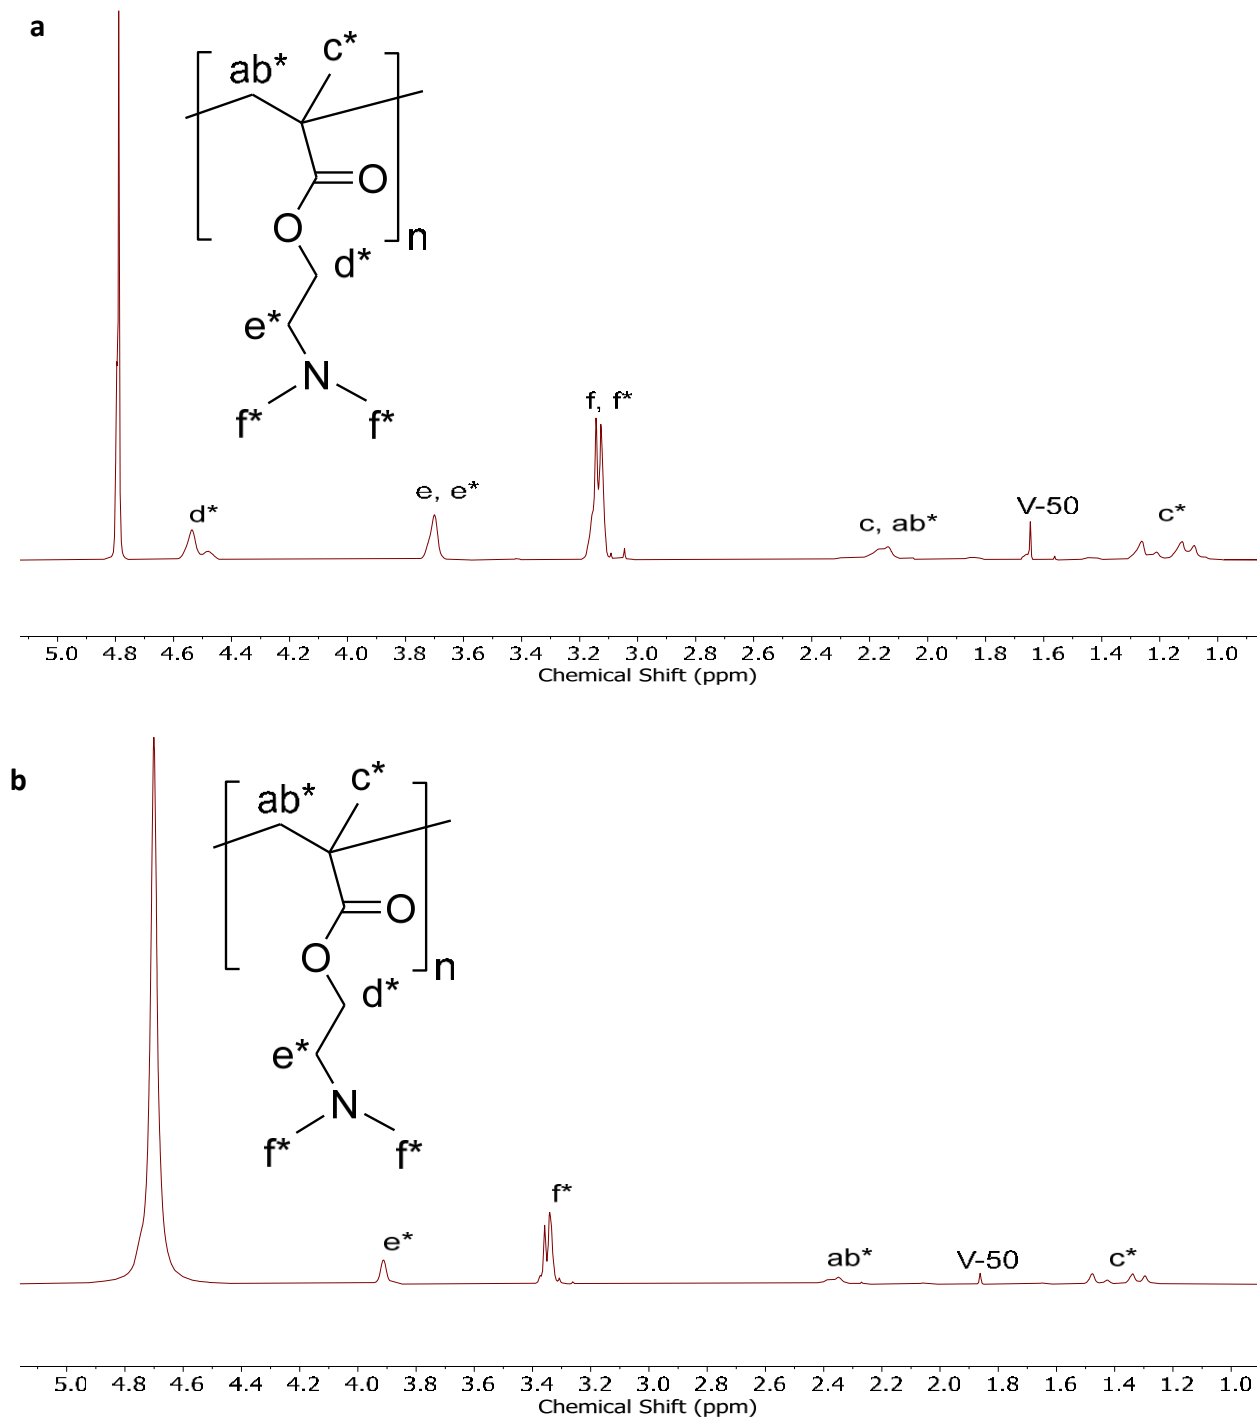

**Figure S6.**  $^1\text{H}$  NMR (700 MHz) spectra of poly(DMAEMA) after aqueous polymerization of 5 wt% DMAEMA with 0.4 wt% V-50 to full conversion in  $\text{D}_2\text{O}$  at  $60^\circ\text{C}$  for 1 h at: (a) pH = 1.0 and (b) pH = 4.0



## Calculations of DMAEMA Hydrolysis and Copolymerization Rates

The copolymerization calculation procedures for polymerizations conducted under conditions at which hydrolysis also occurs are given below (A.I. = integration area):

$$C_{\text{DMAEMA}_{\text{initial}}} = C_{\text{DMAEMA}|t} + C_{\text{DMAE}|t} + C_{\text{P-D}|t}$$

$$C_{\text{DMAEMA}_{\text{initial}}} = (A.I.)_{\text{DMAEMA}|t=0} + \frac{(A.I.)_{\text{DMAE}|t=0}}{2} + C_{\text{P-D}|t=0}$$

$$C_{\text{DMAE}|t} = C_{\text{MAA}|t} + C_{\text{P-MAA}|t}$$

$$C_{\text{DMAE}|t} = \frac{(A.I.)_{\text{DMAE}|t}}{2}$$

$$\text{Mole fraction of MAA in copolymer} = \frac{C_{\text{P-MAA}|t}}{C_{\text{P-MAA}|t} + C_{\text{P-D}|t}}$$

$$\text{Mole fraction of DMAEMA in copolymer} = \frac{C_{\text{P-D}|t}}{C_{\text{P-MAA}|t} + C_{\text{P-D}|t}}$$

$$\text{Fraction of DMAEMA lost to hydrolysis} = \frac{C_{\text{DMAE}|t}}{C_{\text{DMAEMA}_{\text{initial}}}}$$

$$\text{Fraction of DMAEMA converted to copolymer} = \frac{C_{\text{P-D}|t}}{C_{\text{DMAEMA}_{\text{initial}}}}$$

*Fraction of unreacted DMAEMA*

$$= 1 - \text{Fraction of DMAEMA lost to hydrolysis}$$

$$- \text{Fraction of DMAEMA converted to copolymer}$$

$$\text{Effective DMAEMA conversion} = \frac{\text{Fraction of DMAEMA converted to copolymer}}{1 - \text{Fraction of DMAEMA lost to hydrolysis}}$$

$$\text{MAA conversion} = \frac{C_{\text{P-MAA}|t}}{C_{\text{DMAE}|t}}$$

$$\text{Degree of hydrolysis} = \frac{C_{\text{DMAE}|t}}{C_{\text{DMAEMA}_{\text{initial}}}} \times 100$$

where  $C$  = concentration,  $P-D$  = DMAEMA units in copolymer,  $P-MAA$  = MAA units in copolymer

## Plots of Polymerization Behaviour at Various pH, Temperature, and Initiator Levels

60 °C, 0.4 wt% V-50, pH 8.0 – 10.1

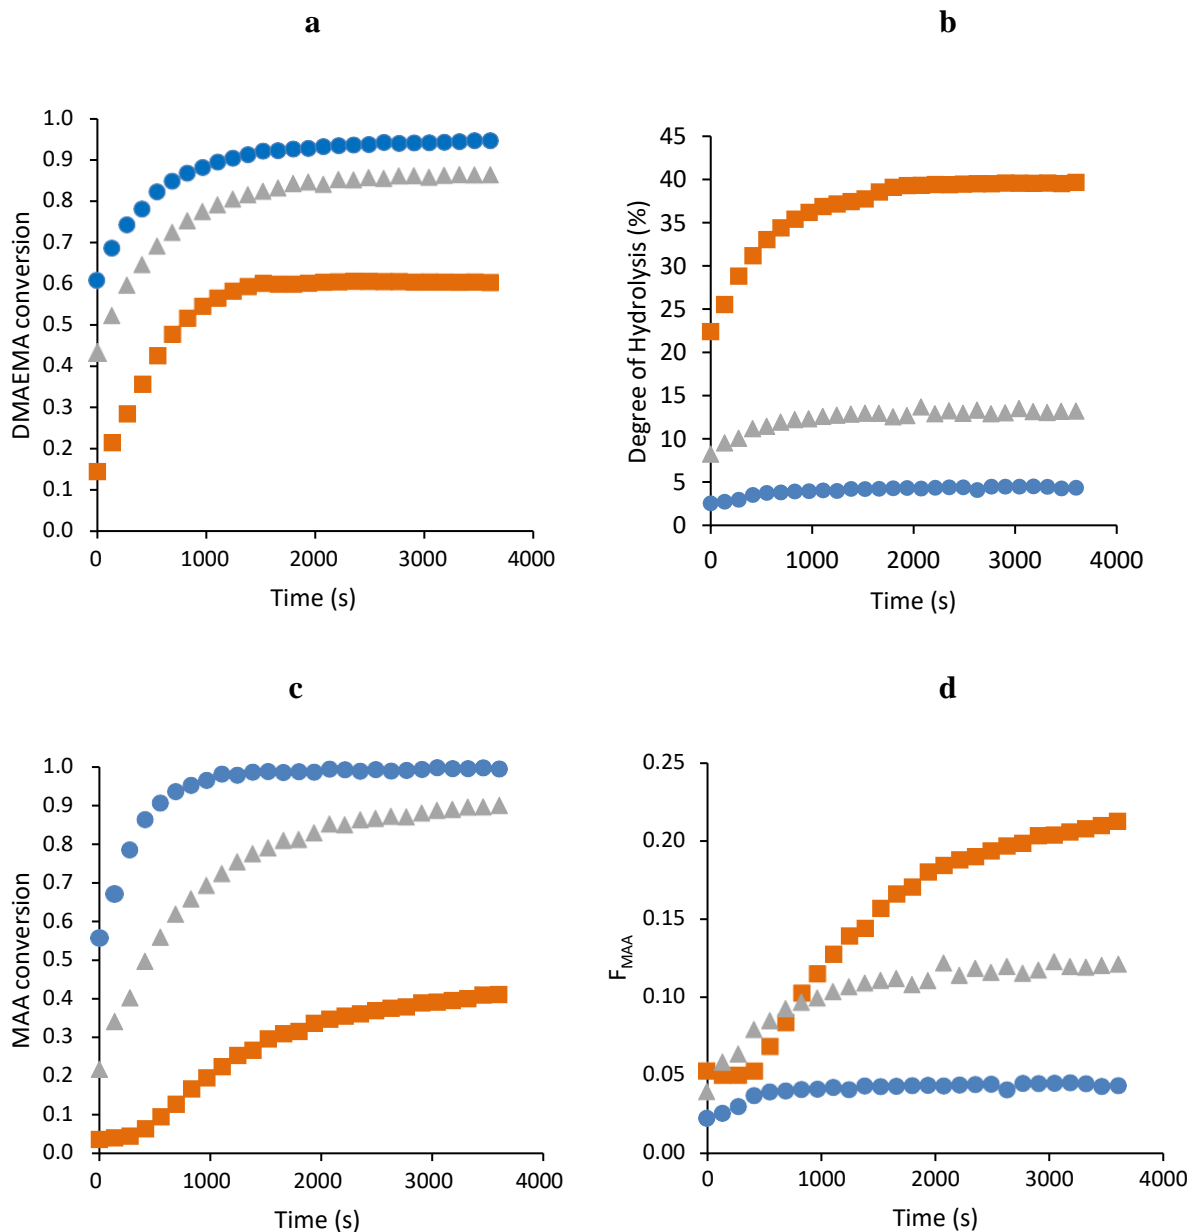

**Figure S7.** Polymerization of DMAEMA in water at 60 °C with initial  $w_{\text{DMAEMA},0} = 0.05$  and  $w_{\text{V-50}} = 0.004$  to form poly(DMAEMA-co-MAA) at pH 10.1 (orange squares), pH 9.0 (gray triangles) and pH 8.0 (blue circles): **(a)** Fractional conversion profiles of DMAEMA incorporated into polymer; **(b)** Degree of DMAEMA hydrolysis during polymerization; **(c)** Fractional MAA conversion profiles; **(d)** Mole fraction of MAA in the copolymer.

50 °C, 0.1 wt% V-50, pH 8.0 – 10.1

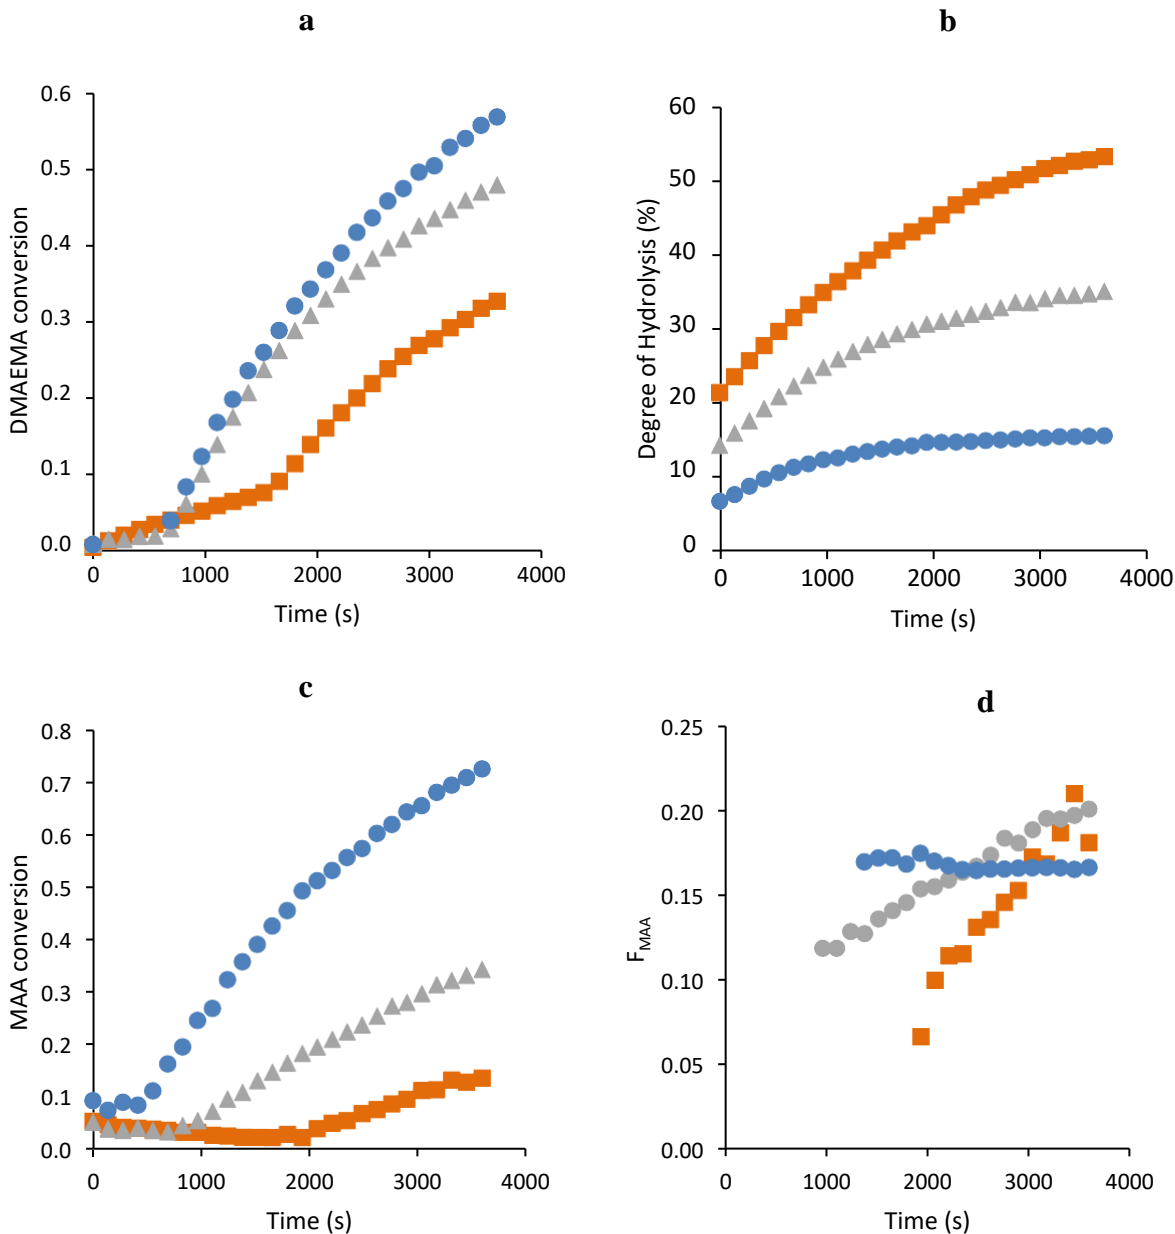

**Figure S8.** Polymerization of DMAEMA in water at 50 °C with initial  $w_{DMAEMA,0} = 0.05$  and  $w_{V-50} = 0.001$  to form poly(DMAEMA-co-MAA) at pH 10.1 (orange squares), pH 9.0 (gray triangles) and pH 8.0 (blue circles): **(a)** Fractional conversion profiles of DMAEMA incorporated into polymer; **(b)** Degree of DMAEMA hydrolysis during polymerization; **(c)** Fractional MAA conversion profiles; **(d)** Mole fraction of MAA in the copolymer.

50 °C, 0.4 wt% V-50, pH 8.0 – 10.1

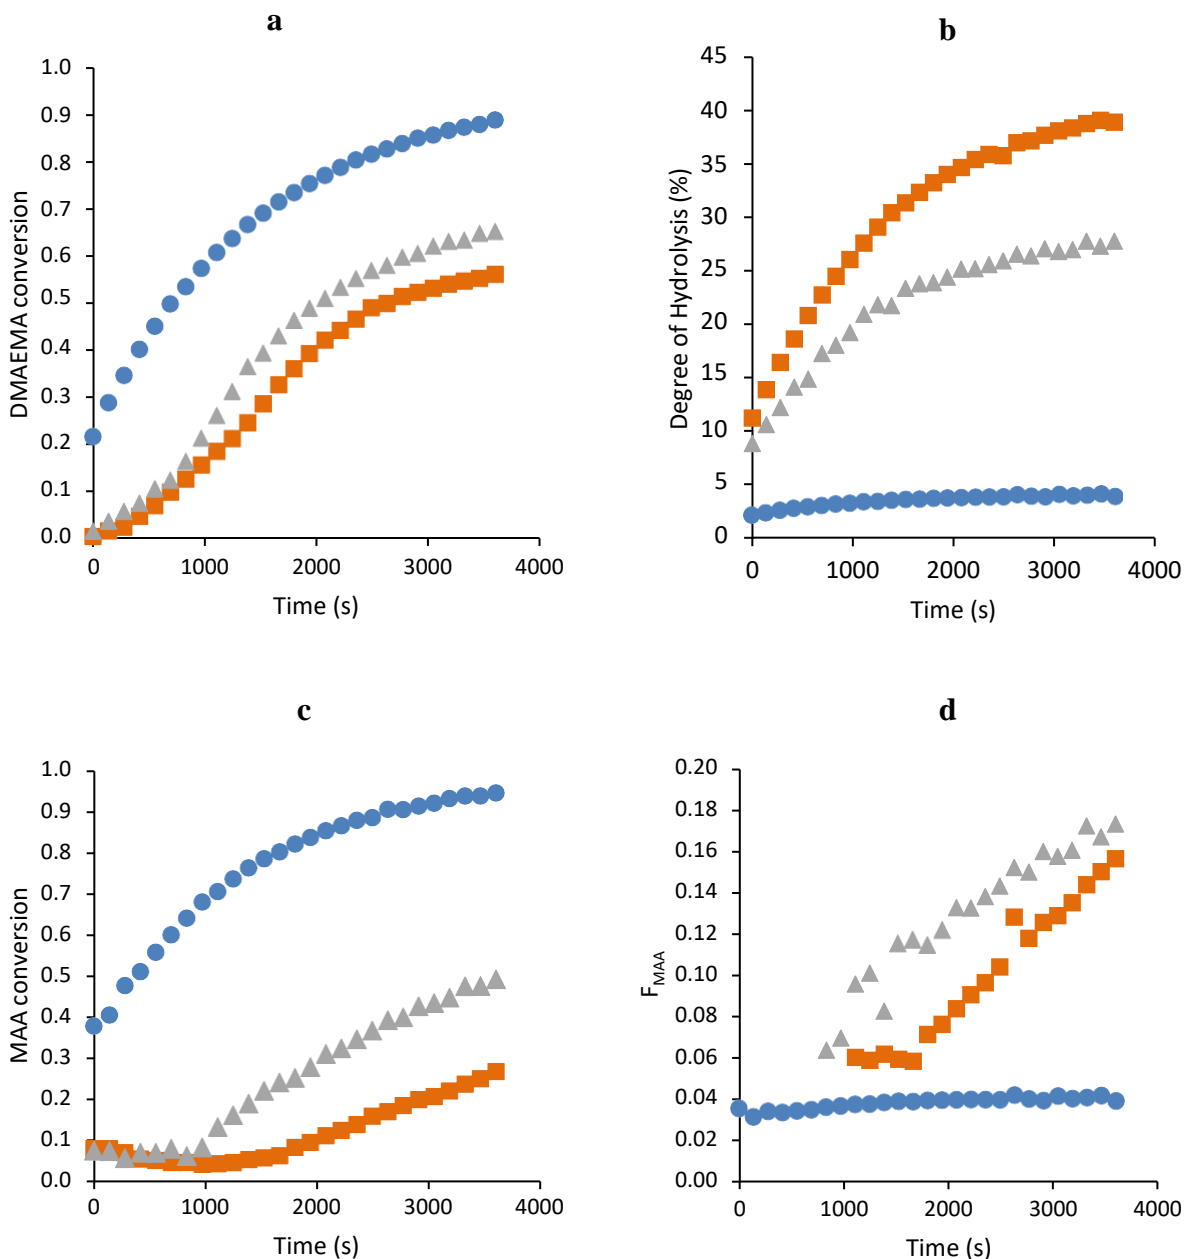

**Figure S9.** Polymerization of DMAEMA in water at 50 °C with initial  $w_{\text{DMAEMA},0} = 0.05$  and  $w_{\text{V-50}} = 0.004$  to form poly(DMAEMA-co-MAA) at pH 10.1 (orange squares), pH 9.0 (gray triangles) and pH 8.0 (blue circles): **(a)** Fractional conversion profiles of DMAEMA incorporated into polymer; **(b)** Degree of DMAEMA hydrolysis during polymerization; **(c)** Fractional MAA conversion profiles; **(d)** Mole fraction of MAA in the copolymer.

## Molar Mass Distributions of Poly(DMAEMA-co-MAA)

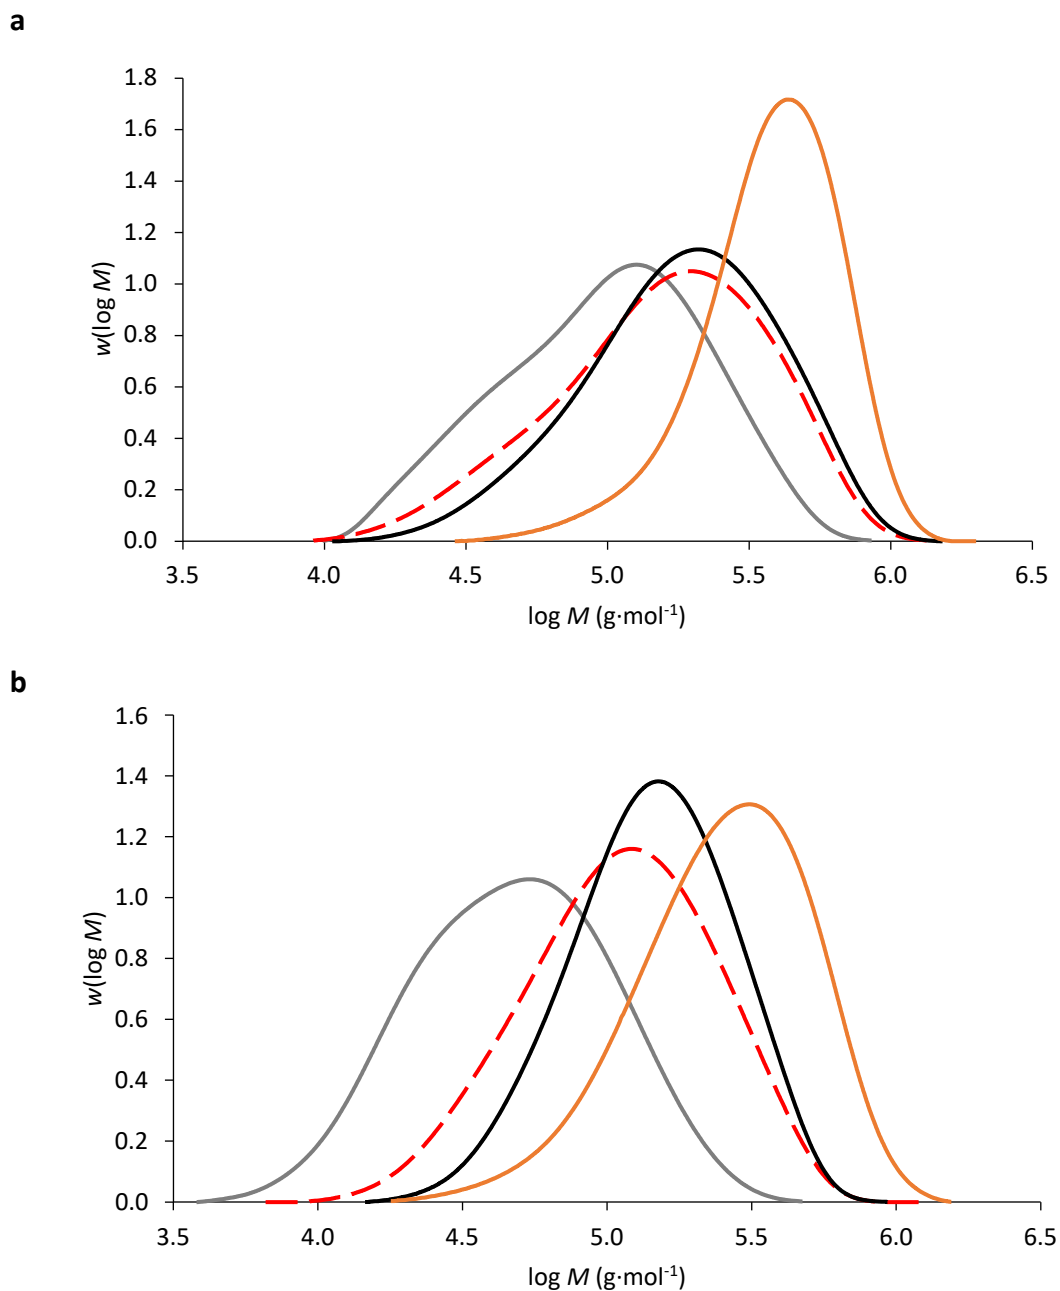

**Figure S10.** Molar mass distributions of poly(DMAEMA-co-MAA) formed from DMAEMA by radical polymerization in aqueous solutions:  $w_{\text{DMAEMA},0} = 0.05$  (60 °C,  $w_{V-50} = 0.004$  (gray); 60 °C,  $w_{V-50} = 0.001$  (red dashes); 50 °C,  $w_{V-50} = 0.004$  (black); 50 °C,  $w_{V-50} = 0.001$  (orange)) at **(a)** pH = 8.0 **(b)** pH = 10.1

## References

1. P. van de Wetering, N. J. Zuidam, M. J. Van Steenbergen, O. A. G. J. Van Der Houwen, W. J. M. Underberg and W. E. Hennink, *Macromolecules*, 1998, **31**, 8063–8068.
2. S. Beuermann, M. Buback, P. Hesse and I. Lacík, *Macromolecules* 2006, **39**, 184–193.
3. I. Lacík, L. Učňová, S. Kukučková, M. Buback, P. Hesse and S. Beuermann, *Macromolecules*, 2009, **42**, 7753–7761.
4. H. Kattner, P. Drawe and M. Buback, *Macromolecules*, 2017, **50**, 1386–1393.
5. P. Zheng, X. Su, C. Fei, X. Shi, H. Yin and Y. Feng, *J. Polym. Sci. B: Polym. Phys.*, 2018, **56**, 914–923.
